# Supplementary material
Source: Springer Nature journal article supplement (https://www.springerprofessional.de/resource/supplementary/40294_2012_8_MOESM1_ESM.pdf/11899552)

**A**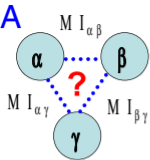

$$\text{Min}\{MI_{\alpha\beta}, MI_{\beta\gamma}, MI_{\alpha\gamma}\}$$

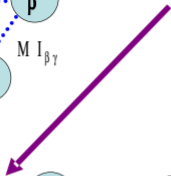**B**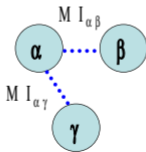**C**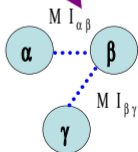**D**

Supplement: MOESM1 [file 11899552]
